# Supplementary material
Source: Springer Nature journal article supplement (https://www.springermedizin.de/resource/supplementary/12887_2011_567_MOESM1_ESM.pdf/9475698)

OR = 3.3  
(95% CI: 1.4-7.8)  
p = 0.007

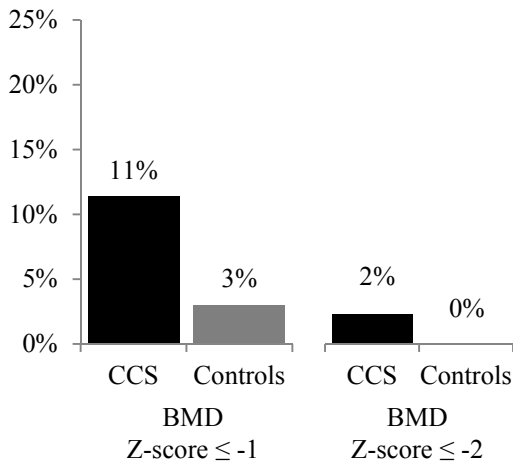

Whole Body

OR = 1.7  
(95% CI: 1.0-2.7)  
p = 0.003

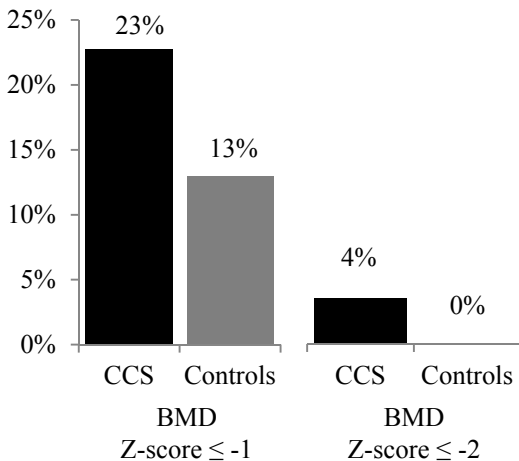

Lumbar Spine

Supplement: MOESM1 [file 9475698]
